1 **Opening Pandora's Box: Distribution of *Plasmodium* gametocytes in**

2 **bloodstream**

3 Pigeault R. <sup>1\*</sup>, Isaïa J. <sup>1</sup>, Yerbanga R. S. <sup>2</sup>, Kounbobr R. D. <sup>2</sup>, Ouedraogo J.B. <sup>2</sup>, Cohuet A. <sup>3</sup>, Lefèvre T.

4 <sup>2,3</sup>, Christophe P. <sup>1</sup>

5 <sup>1</sup> Department of Ecology and Evolution, CH-1015 Lausanne, Switzerland

6 <sup>2</sup> Institut de Recherche en Sciences de la Santé, Bobo-Dioulasso, Burkina Faso

7 <sup>3</sup> Unité MIVEGEC, IRD 224-CNRS 5290-Université Montpellier, Montpellier, France

8

9 \*Corresponding author: [romain.pigeault@unil](mailto:romain.pigeault@unil)

## 10 **Abstract**

11 Malaria, a vector borne disease caused by *Plasmodium* spp., remains a major global cause of  
12 morbidity and mortality. Optimization of the disease control strategies requires a thorough  
13 understanding of the fundamental processes underlying parasite transmission. Although the  
14 number of transmissible stages of *Plasmodium* (gametocyte) in human blood is frequently  
15 used as an indicator of human-to-mosquito transmission potential, this relationship is not  
16 always clear. Important efforts have been made to develop molecular tools to fine-tune  
17 gametocyte densities estimation and therefore improve the prediction of mosquito infection  
18 rates, but a significant level of uncertainty around this estimate remains. Here we show with  
19 both human and avian malaria system that the within-vertebrate host distribution of  
20 gametocytes could explain much of this uncertainty. By comparing gametocyte densities in  
21 bloodstream between different body parts, we found a difference by nearly 50% in humans  
22 and by more than 15% in birds. An estimation of gametocyte density from only one blood  
23 sample, as is usually the case, could therefore drastically over- or underestimated the  
24 infectivity of gametocyte carriers. This might have important consequences on the  
25 epidemiology of the disease since we show, using the avian malaria system, that this variation  
26 influences the transmission of the parasite to the mosquito vector. In the light of our results,  
27 we argue that it is essential to consider the heterogeneous distribution of gametocyte to  
28 improve human diagnosis, identify infectious reservoirs and to test new malaria control  
29 strategies.

30

31 Key words: *P. falciparum*, *P. relictum*, gametocyte density, parasite transmission, diagnosis,  
32 *Culex pipiens*

## 33 Introduction

34           According to estimates by the World Health Organisation, 219 million cases of malaria  
35 had occurred in 2017 with more than 435 000 resulting in death (1). Despite a 50% decline in  
36 malaria-related mortality between 2000 and 2015, the number of malaria cases is increasing  
37 in several African countries since then. In 2017, the 10 most affected countries on this  
38 continent have suffered from 3.5 million additional cases of malaria compared to the previous  
39 year. To date, control strategies have aimed at reducing malaria transmission through early  
40 human diagnosis and treatment but also through vector control interventions (2). The efficacy  
41 of these interventions is however continually challenged and threatened by the evolution of  
42 insecticide (3, 4) and drug resistances (5, 6). To overcome resistance issues, the re-emergence  
43 of the concept of malaria transmission-blocking strategies (7–10) has boosted the research  
44 efforts to find molecules (11, 12) or microorganisms (13–16) able to inhibit the transmission  
45 of parasites or to disturb the life cycle of *Plasmodium* in the mosquito vector. Understanding  
46 the fundamental processes of parasite transmission from human to mosquito vector is  
47 therefore essential to this aim.

48           A mosquito blood meal represents a volume of 1.5 to 4 $\mu$ l on average (17, 18) and it  
49 needs to contain at least one gametocyte (sexual stage) of both sexes to result in malaria  
50 infection. Although the shape of the relationship between gametocyte densities measured in  
51 the human blood and the probability or the intensity of mosquito infection is not always clear,  
52 the likelihood of mosquito infection seems to be mainly dictated by gametocyte density (19,  
53 20). Therefore, the number of gametocytes in human blood is frequently used as an indicator  
54 of human-to-mosquito transmission potential (21–23). Robust estimation of gametocyte  
55 density is therefore essential to the identification of the human infection reservoir. Although,  
56 sensitive molecular techniques have been developed to significantly improve the detection,

57 quantification and possibly sex determination of gametocytes (19, 21, 24–26), the temporal  
58 and spatial dynamics of gametocyte distribution and infectivity in vertebrate hosts remain  
59 relatively neglected. Gametocyte density are mostly estimated from a single blood sample  
60 from a single body location (e.g. finger prick or antecubital venous blood). Such snapshots  
61 certainly fail to grasp the complex and dynamic nature of vertebrate host infection. For  
62 instance, a recent study showed that at night, rodent malaria *P. chabaudi* gametocytes are  
63 twice as infective compared to the daily ones, despite being less numerous in the blood (27).  
64 In the avian malaria system, a periodic increase of parasitaemia is observed in the late  
65 afternoon (28). Regarding the spatial distribution of mature gametocytes in the bloodstream,  
66 a handful of studies have compared their density between venous and capillary blood. A  
67 majority of them have found a higher density of gametocytes in capillary than in venous blood  
68 ((29–33) but see (34, 35)). However, comparisons of the number of gametocytes from the  
69 same blood compartment (veins or capillaries) but from different body parts has been  
70 investigated in a unique study conducted in 1952, where a 3-fold higher prevalence of  
71 gametocytes in skin capillary blood compared to thick smears prepared from finger-prick has  
72 been observed (36).

73         Mature gametocytes have long been considered passively displaced by the blood flow  
74 (37–39), suggesting a random or even a homogeneous distribution in the peripheral  
75 circulatory compartment (40–44). A study carried out in the early 2000s has shaken this  
76 paradigm by providing evidences that the distribution of gametocytes ingested by mosquitoes  
77 from the skin of three naturally-infected volunteers followed a negative binomial distribution  
78 and not a Poisson distribution, as expected if gametocytes circulate in a homogenous pattern  
79 in the peripheral bloodstream (45). This result suggests an aggregated distribution of  
80 gametocytes in the vertebrate peripheral bloodstream (45, 46). Another indirect evidence of

81 the non-homogeneous distribution of gametocytes in the vertebrate host body comes from a  
82 review of the literature. In human malaria, the proportion of studies showing a positive  
83 relationship between gametocyte density and parasite transmission to mosquito increases  
84 drastically when mosquitoes were fed via an artificial membrane-feeding method compared  
85 to mosquitoes fed directly through the skin of an infected host (Figure S1, Table S1). Artificial  
86 feeding techniques eliminates the potential heterogeneity in gametocyte spatial distribution  
87 in the host and the density of gametocytes is measured from the blood that will then be used  
88 to feed mosquitoes.

89 To date, no study has empirically studied the distribution of *Plasmodium* gametocytes  
90 in the peripheral blood compartment of the vertebrate host. Our specific aims in this study  
91 are to answer two questions. First, is the *Plasmodium* gametocytes density homogeneous or  
92 heterogeneous between different body parts of the vertebrate host? Second, is the  
93 transmission of *Plasmodium* to the vector comparable according to the location of mosquito  
94 bites? This work uses both human (*P. falciparum/Anopheles gambiae s.s*) and avian malaria  
95 (*P. relictum/Culex pipiens*) systems to measure simultaneously gametocyte density at two  
96 different locations of host body: the left and right hand in humans and the left and right leg in  
97 birds. The intra-individual variation rate in gametocyte density was used as a proxy to  
98 determine whether *Plasmodium* sexual stage is homogeneously distributed in host body. Due  
99 to ethical reasons, the impact of mosquito biting sites on parasite transmission was carried  
100 out only with the avian malaria system. Avian malaria is the oldest experimental model for  
101 investigating the life cycle of *Plasmodium* parasites and it was rapidly identified as the ideal  
102 experimental system for understanding the biology of human malaria parasites (47).  
103 Hereafter, we show that both *P. falciparum* and *P. relictum* are not homogeneously distributed

104 in the peripheral bloodstream of the host and we argue that this can have implications for the  
105 parasite transmission to the mosquito vector.

## 106 **Results**

### 107 **Spatial heterogeneity of *Plasmodium* infection in vertebrate host**

108 The number of gametocytes was significantly different between the two hands ( $\chi^2_1=$   
109 26.46,  $P < 0.0001$ , Figure 1A). Nevertheless, it was not always the same hand (right or left) that  
110 had the highest gametocyte density ( $\chi^2_1= 3.378$ ,  $P = 0.077$ ). The average variation rate of the  
111 number of gametocytes between the two parts of the body was  $0.45 \pm 0.06$  (Figure 1A) and  
112 variation rates were negatively correlated to human gametocytaemias ( $\chi^2_1= 8.60$ ,  $P = 0.003$ ,  
113 Figure 2A). Fitting the quadratic term (gametocytaemia<sup>2</sup>) improved the model fit ( $\chi^2_1= 5.66$ ,  $P$   
114  $= 0.017$ ), suggesting that variation rate was a decelerating polynomial function of human  
115 gametocytaemia (Figure 2A).

116 Bird parasitaemia was used as a proxy for gametocytemia because parasitaemia and  
117 gametocytaemia are strongly positively correlated in this system (see Figure 2 in Pigeault et  
118 al. 2015). Bird parasitaemia was significantly different between the two legs ( $\chi^2_1= 7.45$ ,  $P =$   
119  $0.006$ , Figure 1B), but it was not always the same body part (right or left leg) that showed the  
120 highest parasite density ( $\chi^2_1= 3.02$ ,  $P = 0.082$ ). Since some of the birds were exposed to  
121 mosquitoes before blood sampling (see below), we also compared the parasitaemia of control  
122 and exposed birds and we did not observe any difference ( $\chi^2_1= 0.613$   $P = 0.433$ ). The average  
123 variation rate of parasitaemia between the two legs was  $0.16 \pm 0.04$  (Figure 1B). As for human  
124 malaria, the variation rates were negatively correlated to bird parasitaemias ( $\chi^2_1= 7.57$ ,  $P =$   
125  $0.006$ , Figure 2B) and fitting the quadratic term (parasitaemia<sup>2</sup>) improved the model fit ( $\chi^2_1=$   
126  $5.65$ ,  $P = 0.017$ , Figure 2B).

## 127 **Parasite transmission to mosquito vector**

128 To investigate the effect of the location of mosquito bites on *Plasmodium* transmission,  
129 left and right legs of infected birds (*Serinus canaria*) were independently but simultaneously  
130 exposed to mosquitoes (*Culex pipiens*) during 3 hours. Immediately after the exposure session,  
131 blood from both legs was collected to measure parasite densities and each leg was classified  
132 as either lower infected leg (LIL) or higher infected leg (HIL). Blood-fed mosquitoes were  
133 dissected one-week post-blood meal to count the number of parasites in their midgut.

134 There was no significant difference between female mosquitoes fed on the lower (LIL)  
135 or on the higher infected leg (HIL) in either the proportion of blood-fed females ( $\chi^2_1 = 0.689$  P  
136 = 0.406), blood meal size ( $\chi^2_1 = 0.048$  P = 0.826) and infection prevalence (proportion of  
137 mosquitoes containing at least 1 oocyst,  $\chi^2_1 = 0.108$  P = 0.478, Figure 3A). The analysis of oocyst  
138 burden included mosquitoes having at least one oocyst in the midgut. A significant difference  
139 in oocyst burden was observed ( $\chi^2_1 = 4.571$  P = 0.032, Figure 3B). Females fed on the HIL had a  
140 higher oocyst burden than females fed on the LLP (mean  $\pm$  s.e. females fed on LLP:  $9.75 \pm 2.47$ ,  
141 females fed on LHP:  $16.27 \pm 2.65$ ).

## 142 **Discussion**

143 Reduction of *Plasmodium* transmission from the vertebrate host to the insect vector is  
144 a key component of global efforts to control malaria (48). Understanding the processes that  
145 underlie the relationship between *Plasmodium* gametocyte densities and mosquito infection  
146 is therefore crucial to assess the effectiveness of control programs and their effects on  
147 transmission. Nevertheless, an essential first step to meet this goal is to obtain an accurate  
148 estimation of gametocyte density in infected host. For this purpose, significant efforts have  
149 been made to develop new molecular tools to detect and estimate more precisely the

150 gametocyte densities for both males and females. It is interesting to note that these methods  
151 have also significantly improved the prediction of mosquito infection rates (19). Nevertheless,  
152 a significant level of uncertainty remains.

153         An aspect that is all too rarely mentioned and, above all, very rarely quantified  
154 concerns the spatial distribution of mature gametocytes within the vertebrate host. Here, we  
155 showed that the number of gametocytes fluctuates by nearly 50% between the two human  
156 hands and by more than 15% between the two legs of the birds. Therefore, gametocytes did  
157 not seem to be homogeneously distributed within the vertebrate host body and we highlight  
158 that this could have an impact on parasite transmission to the mosquito vector. Using the  
159 avian malaria system, we showed that mosquitoes fed on the least infected body part have a  
160 lower parasite burden than those fed on the most infected part. Consequently, using a single  
161 measurement of gametocyte density from a single blood sample at a unique body part does  
162 not provide a good estimate of a host's infectivity. Our results suggest that the most efficient  
163 way to obtain a more accurate estimate of the total gametocyte densities and therefore a  
164 more predictable infectiousness indicator would be to combine several independent density  
165 measurements from different body parts.

166         The mechanisms leading to the establishment of a non-homogeneous distribution of  
167 *Plasmodium* in the blood of the vertebrate host are unknown. Gametocytes are not motile  
168 and cannot therefore actively migrate to accumulate in the capillaries. Passive accumulation  
169 of gametocytes in some sub-dermal capillaries could induce a non-homogeneous distribution  
170 of *Plasmodium* in the vertebrate host. For instance, the elongated asymmetric curvature of *P.*  
171 *falciparum* gametocytes may facilitate their blockage in the dermal capillaries (49). Mature  
172 gametocyte aggregation might also partly explain the spatial heterogeneity in the distribution  
173 of gametocytes (45, 50). Active aggregation mechanisms with, for instance binding interaction



174 between infected red blood cells containing late developmental stages of the gametocyte,  
175 have however never been observed in both human and avian malaria parasite (“rosetting-  
176 like” adhesion, (51)).

177         When the gametocyte density is low, an adaptive strategy allowing the aggregation of  
178 several sexual stages of *Plasmodium* may increase the probability that a mosquito will be  
179 infected (52). In this case, while the majority of blood-fed mosquitoes did not ingest any  
180 parasite, those biting an area containing aggregated gametocytes will be undoubtedly  
181 infected by malaria. Nonetheless, this strategy would be non-adaptive if the gametocyte  
182 density increases to a level that allows the ingestion of at least two gametocytes regardless of  
183 the mosquito biting site. In this case, homogeneous distribution should optimize transmission.  
184 A plastic strategy with a regulation of the level of aggregation according to vertebrate host  
185 gametocytaemia would then be an optimal process to promote the transmission of the  
186 parasite to the mosquito vector throughout the infection. Interestingly, our results fit in with  
187 a plastic adaptive strategy. We showed that the variation rate in the number of gametocytes  
188 count between two different body parts decreases with the increase in average  
189 gametocytaemia.

190         Despite the match between our empirical results and the plastic adaptive strategy  
191 hypothesis, alternative explanations challenge our results. Given that malaria infection is  
192 temporally dynamic (28, 53), the single measurement used in this study to compare the  
193 number of parasites between different body parts does not allow to determine whether non-  
194 homogeneous distribution is stable over time or whether it is a single snapshot that does not  
195 reflect a more complex dynamic process. It would be relevant to monitor gametocyte density  
196 at different body parts with repeated measurements over the course of the infection. Of  
197 particular relevance would be to compare gametocytes densities among different body

198 locations in regard to variation in mosquito attraction to these sites. For instance, it is known  
199 that the major vectors of *P. falciparum* (*An. gambiae s.s.*, *An. arabiensis*, *An. funestus*) all have  
200 strong preference for feeding close to the ground which is associated to increased biting rate  
201 on legs, ankles and feet (54–56). Accordingly, higher gametocyte density would be expected  
202 in these highly attractive body parts.

203 Improving the detection and estimation of gametocyte density in infected hosts is  
204 fundamental to improve diagnosis of gametocyte carriers and therefore identify infectious  
205 reservoirs but also to develop and test new malaria control strategies. In this study, we found  
206 that the gametocyte burden varies significantly between different body parts. We argue that  
207 it would then be essential to perform several blood samples at different body parts with  
208 respect to preference for biting to refine our understanding of the within-host malaria  
209 infection dynamic and ultimately the fundamental processes underlying the parasite  
210 transmission from human-to-mosquito.

211

## 212 **Materials & Methods**

### 213 **Human malaria**

214 The study was conducted at the Institut de Recherche en Sciences de la Santé in Bobo  
215 Dioulasso, South-Western Burkina Faso. The intensity of malaria transmission is high and  
216 perennial in this area with a peak from August to November. Blood slides were collected from  
217 December 2018 to July 2019 from asymptomatic children aged 5-12 years attending the  
218 elementary schools of Dandé, Soumousso, Klesso, Samandeni - four villages located in the  
219 surroundings of Bobo Dioulasso. *P. falciparum* is the predominant parasite species in these  
220 villages, accounting for more than 95% of malaria cases (57).

221 Samples were collected prior to treatment with a dose of artemether–lumefantrine  
222 according to National Malaria Control Programme recommendation and after written  
223 informed consent was obtained from the parent(s) or guardian(s). Ethical clearance was  
224 provided by the national ethics committee of Burkina Faso (no. 2018-9-118) and the  
225 institutional committee of IRSS (no. A06-2018/CEIRES).

226 Finger prick blood samplings were carried out on the two hands of each volunteer so  
227 that two Giemsa-stained blood smears per volunteer were screened for asexual parasites and  
228 gametocytes. Gametocyte density was estimated by microscopy against 1000 leucocytes and  
229 slides were declared negative after a minimum reading of 100 fields. Each slide was read twice  
230 by two independent qualified microscopists (57). The two gametocyte density measurements  
231 for each slide were then used to calculate an average gametocyte density for each hand of  
232 each individual. The two hands (right and left) of each individual were then classified as lower  
233 infected hand or higher infected hand.

#### 234 **Avian malaria**

235 This study was approved by the Ethical Committee of the Vaud Canton veterinary  
236 authority, authorization number 1730.4.

#### 237 *Parasite strain*

238 *Plasmodium relictum* is the most prevalent form of avian malaria in Europe (58). The  
239 lineage used in these experiments (lineage SGS1) was isolated from infected great tits (*Parus*  
240 *major*) caught in the region of Lausanne (Switzerland) in 2015. Parasite was passaged to an  
241 uninfected canary (*Serinus canaria*) by intraperitoneal injection and has been maintained by  
242 carrying out regular passages between infected and naïve canaries. For both experimental  
243 blocks, eight uninfected canaries were experimentally inoculated by means of an

244 intraperitoneal injection of 150\_200 $\mu$ L of an infected blood pool constituted of a mixture of  
245 blood from five infected canaries. Birds of the same experimental block were infected with  
246 the same pool of blood. The eight infected birds of each block were assigned to two  
247 treatments: “exposed” (n=5) or “unexposed” (n=3) to mosquito bites (Figure 1B).

#### 248 *Mosquitoes rearing*

249 The two experimental blocks were conducted with wild *Culex pipiens* mosquito  
250 collected from the field (Lausanne, 46°31'25.607"N 6°34'40.714"E, altitude: 380 m) and  
251 maintained under laboratory condition since August 2017. Mosquitoes were reared as  
252 described by Vézilier et al. (59) in an insectary at 25°C  $\pm$  1°C, 70  $\pm$  5% RH and with 14L:10D  
253 photoperiod. One day before each experimental block, 500 7-10 days old female mosquitoes  
254 were haphazardly chosen from different emergence cages and placed inside new cages (100  
255 females per cage). Females were deprived of sugar solution for 24h to increase hunger levels  
256 in order to maximize overall biting rate. Water was provided from 24h to 6h before the  
257 experiment to prevent dehydration.

#### 258 *Experimental design*

259 The two experimental blocks were carried in February and April 2018 respectively.  
260 Twelve days post-bird infection (to coincide with the acute phase of the *Plasmodium relictum*  
261 infection in canaries, (60)) “exposed” individuals were placed individually in two  
262 compartments cages designed for physically separating their two legs. At 6:00 pm, a batch of  
263 45-50 uninfected female mosquitoes was added in each compartment (left and right) for 180  
264 minutes. Unexposed birds were placed in the same experimental condition but without  
265 mosquitoes. At the end of the mosquito exposure session (9:00 pm) a red lamp was used to  
266 capture mosquitoes and five microliters of blood were collected from the medial metatarsal

267 vein of both canary legs. For each leg of each bird, three drops of blood were smeared onto  
268 three different microscope slides. Blood fed mosquitoes were placed individually into  
269 numbered plastic tube covered with a mesh. Food was provided in the form of a cotton pad  
270 soaked in a 10% sugar solution placed on top of each tube. Between 7 and 8 days post-blood  
271 meal, female mosquitoes were dissected and the number of *Plasmodium* oocysts in their  
272 midgut was counted with the aid of a binocular microscope (59). Haematin excreted at the  
273 bottom of each plastic tube was quantified as an estimate of the female's blood meal size (59).

274 The intensity of bird infection (parasitaemia) was determined visually by calculating  
275 the number of infected red blood cell per 3000 erythrocytes in randomly chosen fields on the  
276 blood smears (58). Parasitaemia measured on the three blood smears were used to calculate  
277 an average parasitaemia (mean  $\pm$  SE) for each leg of each bird. The two legs (right and left) of  
278 each bird was then classified as Lower infected leg (LIL) or higher infected leg (HIL). All  
279 parasitaemia was measured by the same experimenter. Parasitaemia was used as a proxy for  
280 transmissible stage (gametocytes) production because parasitaemia and gametocytaemia are  
281 strongly positively correlated in this system (see Figure 2 in (60)).

## 282 **Statistical analyses**

### 283 *Human malaria*

284 The analyses of the number of gametocytes were carried out using a generalized linear  
285 mixed model (GLMM) procedure with a negative binomial family. To study whether  
286 gametocyte numbers were similar between both human hands, the average gametocyte  
287 count was used as response variable. Hand class (lower or higher infected) and hand side (left  
288 or right) were fitted as fixed factor and individual were fitted as random factor.

### 289 *Avian malaria*

290 The analyses of birds' parasitaemia were carried out using a linear mixed model  
291 procedure with a normal error distribution. To study whether parasitaemia was similar  
292 between both legs, the average parasitaemia was used as response variable. Leg class (lower  
293 or higher infected), leg side (left or right) and bird treatment (exposed or unexposed to  
294 mosquito) were fitted as fixed factors. Individual, nested in experimental block, was fitted as  
295 random factor.

296 Mixed effects models were used to analyze the effect of bird leg (LLP or LHP) on the  
297 mosquito blood meal rate (proportion of females that had taken a blood meal), blood meal  
298 size and *Plasmodium* transmission to the vector. Explanatory variables, leg class (LLP or LHP)  
299 and haematin (when it was appropriate), were fitted as fixed factors. Individuals, nested in  
300 experimental block, were fitted as a random factor. Blood meal rate and infection prevalence  
301 (oocyst presence/absence) were analyzed using GLMM with a binomial error distribution  
302 (lme4 package). Blood meal size and mosquito infection intensity (number of oocysts) were  
303 analyzed using lmer with normal error distribution (lme4 package). For the analysis of  
304 infection intensity, only individuals that developed  $\geq 1$  oocyst were included.

305 Maximal models, including all higher order interactions, were simplified by eliminating  
306 non-significant terms and interactions to establish a minimal model (61). Non-significant  
307 interactions and terms were removed step by step according to their significance using a  
308 likelihood ratio test which is approximately distributed as a Chi square distribution (0.05 was  
309 used as the cutoff for p-value significance, (62)). The significant Chi square-values given in the  
310 text are for the minimal model, while non-significant values correspond to those obtained  
311 before deletion of the variable from the model. Analyses were carried out using the R  
312 statistical package (v. 3.4.1, <http://www.cran.r-project.org/>).

## 313 References

- 314 1. WHO | World malaria report 2018. *WHO* (September 27, 2019).
- 315 2. S. Bhatt, *et al.*, The effect of malaria control on *Plasmodium falciparum* in Africa  
316 between 2000 and 2015. *Nature* **526**, 207–211 (2015).
- 317 3. M. Weill, *et al.*, Comparative genomics: Insecticide resistance in mosquito vectors.  
318 *Nature* **423**, 136–137 (2003).
- 319 4. H. Ranson, N. Lissenden, insecticide resistance in african *Anopheles* mosquitoes: A  
320 worsening situation that needs urgent action to maintain malaria control. *Trends*  
321 *Parasitol.* **32**, 187–196 (2016).
- 322 5. R. N. Price, *et al.*, Mefloquine resistance in *Plasmodium falciparum* and increased  
323 pfmdr1 gene copy number. *Lancet Lond. Engl.* **364**, 438–447 (2004).
- 324 6. F. Ariey, *et al.*, A molecular marker of artemisinin-resistant *Plasmodium falciparum*  
325 malaria. *Nature* **505**, 50–55 (2014).
- 326 7. R. Carter, D. H. Chen, Malaria transmission blocked by immunisation with gametes of  
327 the malaria parasite. *Nature* **263**, 57 (1976).
- 328 8. R. Carter, Transmission blocking malaria vaccines. *Vaccine* **19**, 2309–2314 (2001).
- 329 9. O. K. Doumbo, K. Niaré, S. A. Healy, I. S. and P. E. Duffy, Malaria transmission-blocking  
330 vaccines: present status and future perspectives. *Malar. Elimin. - Leap Forw.* (2018)  
331 <https://doi.org/10.5772/intechopen.77241> (September 6, 2019).
- 332 10. F. K. Acquah, J. Adjah, K. C. Williamson, L. E. Amoah, Transmission-blocking vaccines:  
333 old friends and new prospects. *Infect. Immun.* **87**, e00775-18 (2019).
- 334 11. D. K. Mathias, *et al.*, A small molecule glycosaminoglycan mimetic blocks *Plasmodium*  
335 invasion of the mosquito midgut. *PLOS Pathog.* **9**, e1003757 (2013).
- 336 12. G. Niu, *et al.*, Targeting mosquito FREP1 with a fungal metabolite blocks malaria  
337 transmission. *Sci. Rep.* **5**, 14694 (2015).
- 338 13. Y. Dong, F. Manfredini, G. Dimopoulos, Implication of the mosquito midgut microbiota  
339 in the defense against malaria parasites. *PLoS Pathog* **5**, e1000423 (2009).
- 340 14. C. M. Cirimotich, J. L. Ramirez, G. Dimopoulos, Native microbiota shape insect vector  
341 competence for human pathogens. *Cell Host Microbe* **10**, 307–310 (2011).
- 342 15. G. L. Hughes, A. Rivero, J. L. Rasgon, *Wolbachia* can Enhance *Plasmodium* infection in  
343 mosquitoes: implications for malaria control? *PLOS Pathog.* **10**, e1004182 (2014).

- 344 16. A. Boissière, *et al.*, Midgut microbiota of the malaria mosquito vector *Anopheles*  
345 *gambiae* and interactions with *Plasmodium falciparum* infection. *PLoS Pathog* **8**,  
346 e1002742 (2012).
- 347 17. M. J. Klowden, A. O. Lea, Blood meal size as a factor affecting continued host-seeking  
348 by *Aedes aegypti* (L.). *Am. J. Trop. Med. Hyg.* **27**, 827–831 (1978).
- 349 18. A. Ogunrinade, The measurement of blood meal size in *Aedes aegypti* (L.). *Afr. J. Med.*  
350 *Med. Sci.* **9**, 69–71 (1980).
- 351 19. J. Bradley, *et al.*, Predicting the likelihood and intensity of mosquito infection from sex  
352 specific *Plasmodium falciparum* gametocyte density. *eLife* **7** (2018).
- 353 20. D. F. Da, *et al.*, Experimental study of the relationship between *Plasmodium*  
354 gametocyte density and infection success in mosquitoes; implications for the  
355 evaluation of malaria transmission-reducing interventions. *Exp. Parasitol.* **149**, 74–83  
356 (2015).
- 357 21. A. Ouédraogo, *et al.*, Dynamics of the human infectious reservoir for malaria  
358 determined by mosquito feeding assays and ultrasensitive malaria diagnosis in Burkina  
359 Faso. *J. Infect. Dis.* **213**, 90–99 (2016).
- 360 22. C. Koepfli, G. Yan, *Plasmodium* gametocytes in field studies: Do we measure  
361 commitment to transmission or detectability? *Trends Parasitol.* **34**, 378–387 (2018).
- 362 23. H. C. Slater, *et al.*, The temporal dynamics and infectiousness of subpatent *Plasmodium*  
363 *falciparum* infections in relation to parasite density. *Nat. Commun.* **10**, 1433 (2019).
- 364 24. E. Essuman, *et al.*, A Novel gametocyte biomarker for superior molecular detection of  
365 the *Plasmodium falciparum* infectious reservoirs. *J. Infect. Dis.* **216**, 1264–1272 (2017).
- 366 25. M. Gruenberg, *et al.*, Molecular and immunofluorescence-based quantification of male  
367 and female gametocytes in low-density *P. falciparum* infections and their relevance for  
368 transmission. *J. Infect. Dis.* (2019) <https://doi.org/10.1093/infdis/jiz420>.
- 369 26. L. Meerstein-Kessel, *et al.*, A multiplex assay for the sensitive detection and  
370 quantification of male and female *Plasmodium falciparum* gametocytes. *Malar. J.* **17**,  
371 441 (2018).
- 372 27. P. Schneider, *et al.*, Adaptive plasticity in the gametocyte conversion rate of malaria  
373 parasites. *PLOS Pathog.* **14**, e1007371 (2018).
- 374 28. R. Pigeault, Q. Caudron, A. Nicot, A. Rivero, S. Gandon, Timing malaria transmission  
375 with mosquito fluctuations. *Evol. Lett.* (2018) <https://doi.org/10.1002/evl3.61>.
- 376 29. R. E. Sinden, “Sexual Development of Malarial Parasites” in *Advances in Parasitology*, J.  
377 R. Baker, R. Muller, Eds. (Academic Press, 1983), pp. 153–216.
- 378 30. J. Ouedraogo, T. Guiguemde, A. Gbary, Etude comparative de la densite parasitaire de  
379 *Plasmodium falciparum* dans le sang capillaire et dans le sang veineux chez des



- 380 porteurs asymptomatiques (région de Bobo-Dioulasso, Burkina Faso). *Médecine*  
381 *D'Afrique Noire* **38**, 601–605 (1991).
- 382 31. A. Njunda, N. Assob, S. Nsagha, M. Mokenyu, E. Kwenti, Comparison of capillary and  
383 venous blood using blood film microscopy in the detection of malaria parasites: A  
384 hospital based study. *Sci J Microbiol* **2**, 89–94.
- 385 32. K. Kast, *et al.*, Evaluation of *Plasmodium falciparum* gametocyte detection in different  
386 patient material. *Malar. J.* **12**, 438 (2013).
- 387 33. J. Mischlinger, *et al.*, Use of capillary blood samples leads to higher parasitemia  
388 estimates and higher diagnostic sensitivity of microscopic and molecular diagnostics of  
389 malaria than venous blood samples. *J. Infect. Dis.* **218**, 1296–1305 (2018).
- 390 34. M. M. Sandeu, *et al.*, Do the venous blood samples replicate malaria parasite densities  
391 found in capillary blood? A field study performed in naturally-infected asymptomatic  
392 children in Cameroon. *Malar. J.* **16**, 345 (2017).
- 393 35. A. Lehane, *et al.*, Comparison on simultaneous capillary and venous parasite density  
394 and genotyping results from children and adults with uncomplicated malaria: a  
395 prospective observational study in Uganda. *BMC Infect. Dis.* **19**, 559 (2019).
- 396 36. L. van den Berghe, M. Chardome, E. Peel, Supériorité des préparations de scarification  
397 du derme sur les préparations de sang périphérique pour le diagnostic de malaria. *Instit*  
398 *Med Trop* **9**, 553–562 (1952).
- 399 37. C. G. Huff, W. Bloom, A malarial parasite infecting all blood and blood-forming cells of  
400 birds. *J. Infect. Dis.* **57**, 315–336 (1935).
- 401 38. C. J. Janse, *et al.*, In vitro formation of ookinetes and functional maturity of *Plasmodium*  
402 *berghei* gametocytes. *Parasitology* **91**, 19–29 (1985).
- 403 39. R. G. Douglas, R. Amino, P. Sinnis, F. Frischknecht, Active migration and passive  
404 transport of malaria parasites. *Trends Parasitol.* **31**, 357–362 (2015).
- 405 40. M. F. Boyd, W. K. Stratman-Thomas, S. F. Kitchen, On the relative susceptibility of  
406 *Anopheles quadrimaculatus* to *Plasmodium vivax* and *Plasmodium falciparum*. *Am. J.*  
407 *Trop. Med. Hyg.* **s1-15**, 485–493 (1935).
- 408 41. R. C. Muirhead-Thomson, E. C. Mercier, Factors in malaria transmission by *Anopheles*  
409 *albimanus* in Jamaica. *Ann. Trop. Med. Parasitol.* **46**, 103–116 (1952).
- 410 42. L. H. Miller, H. N. Fremount, S. A. Luse, Deep vascular schizogony of *Plasmodium*  
411 *knowlesi* in *Macaca mulatta*. *Am. J. Trop. Med. Hyg.* **20**, 816–824 (1971).
- 412 43. M. E. Smalley, S. Abdalla, J. Brown, The distribution of *Plasmodium falciparum* in the  
413 peripheral blood and bone marrow of Gambian children. *Trans. R. Soc. Trop. Med. Hyg.*  
414 **75**, 103–105 (1981).

- 415 44. M. Pritsch, *et al.*, Stability of gametocyte-specific Pfs25-mRNA in dried blood spots on  
416 filter paper subjected to different storage conditions. *Malar. J.* **11**, 138 (2012).
- 417 45. G. Pichon, H. P. Awono-Ambene, V. Robert, High heterogeneity in the number of  
418 *Plasmodium falciparum* gametocytes in the bloodmeal of mosquitoes fed on the same  
419 host. *Parasitology* **121 ( Pt 2)**, 115–120 (2000).
- 420 46. F. O. Gaillard, C. Boudin, N. P. Chau, V. Robert, G. Pichon, Togetherness among  
421 *Plasmodium falciparum* gametocytes: interpretation through simulation and  
422 consequences for malaria transmission. *Parasitology* **127**, 427–435 (2003).
- 423 47. A. Rivero, S. Gandon, Evolutionary ecology of avian malaria: Past to present. *Trends*  
424 *Parasitol.* (2018) <https://doi.org/10.1016/j.pt.2018.06.002> (June 26, 2018).
- 425 48. P. L. Alonso, *et al.*, A Research agenda to underpin malaria eradication. *PLOS Med.* **8**,  
426 e1000406 (2011).
- 427 49. M. Nacher, Does the shape of *Plasmodium falciparum* gametocytes have a function?  
428 *Med. Hypotheses* **62**, 618–619 (2004).
- 429 50. C. P. Nixon, *Plasmodium falciparum* gametocyte transit through the cutaneous  
430 microvasculature: A new target for malaria transmission blocking vaccines? *Hum.*  
431 *Vaccines Immunother.* **12**, 3189–3195 (2016).
- 432 51. G. Neveu, *et al.*, *Plasmodium falciparum* gametocyte-infected erythrocytes do not  
433 adhere to human primary erythroblasts. *Sci. Rep.* **8**, 1–11 (2018).
- 434 52. R. E. L. Paul, S. Bonnet, C. Boudin, T. Tchuinkam, V. Robert, Aggregation in malaria  
435 parasites places limits on mosquito infection rates. *Infect. Genet. Evol.* **7**, 577–586  
436 (2007).
- 437 53. W. P. O’Meara, W. E. Collins, F. E. McKenzie, Parasite prevalence: A static measure of  
438 dynamic infections. *Am. J. Trop. Med. Hyg.* **77**, 246–249 (2007).
- 439 54. R. De Jong, B. G. J. Knols, Selection of biting sites on man by two malaria mosquito  
440 species. *Experientia* **51**, 80–84 (1995).
- 441 55. T. Dekker, *et al.*, Selection of biting sites on a human host by *Anopheles gambiae s.s.*,  
442 *An. arabiensis* and *An. quadriannulatus*. *Entomol. Exp. Appl.* **87**, 295–300 (1998).
- 443 56. L. Braack, *et al.*, Biting behaviour of African malaria vectors: 1. where do the main  
444 vector species bite on the human body? *Parasit. Vectors* **8**, 76 (2015).
- 445 57. A. Bompard, *et al.*, High *Plasmodium* infection intensity in naturally infected malaria  
446 vectors in Africa. *bioRxiv*, 780064 (2019).
- 447 58. G. Valkiunas, *Avian Malaria Parasites and other Haemosporidia* (CRC Press, 2004).

- 448 59. J. Vézilier, A. Nicot, S. Gandon, A. Rivero, Insecticide resistance and malaria  
449 transmission: infection rate and oocyst burden in *Culex pipiens* mosquitoes infected  
450 with *Plasmodium relictum*. *Malar. J.* **9**, 379 (2010).
- 451 60. R. Pigeault, *et al.*, Avian malaria: a new lease of life for an old experimental model to  
452 study the evolutionary ecology of *Plasmodium*. *Phil Trans R Soc B* **370**, 20140300  
453 (2015).
- 454 61. M. J. Crawley, *The R Book* (John Wiley & Sons, 2012).
- 455 62. B. M. Bolker, *Ecological Models and Data in R* (Princeton University Press, 2008).

456 **Figures & legends**

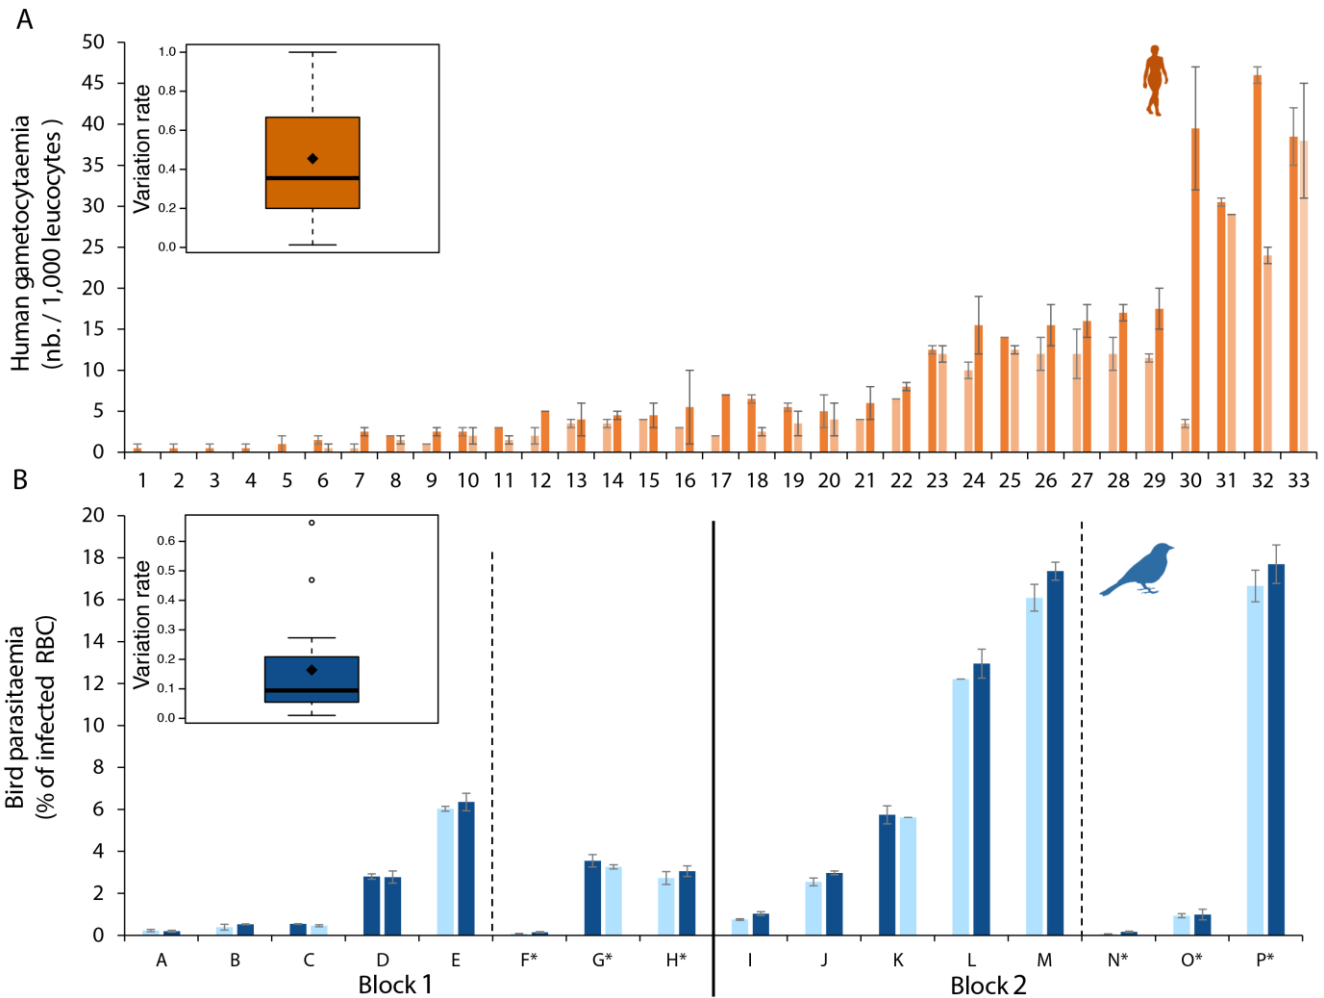

457 **Figure 1.** Variation in infection density between two body parts. (A) Variation in human  
 458 gametocyte density between the left hand (left bar) and the right hand (right bar). (B)  
 459 Variation in bird parasite density between the left leg (left bar) and the right leg (right bar).  
 460 The black vertical line on panel B separates the two experimental blocks (see materials &  
 461 methods). Each number (Human) or letter (bird) correspond to one individual. \* corresponds  
 462 to control individuals (unexposed to mosquito bites). Light color bar correspond to the body  
 463 part with the lower gametocyte density (human) or parasite density (bird), the dark color bar  
 464 correspond to the body part with the higher gametocyte (human) or parasite (bird) density.  
 465 Boxplots represent the variation rate in parasite density measured between the two body  
 466 parts. Error bars represent standard error around the mean. RBC: red blood cell.

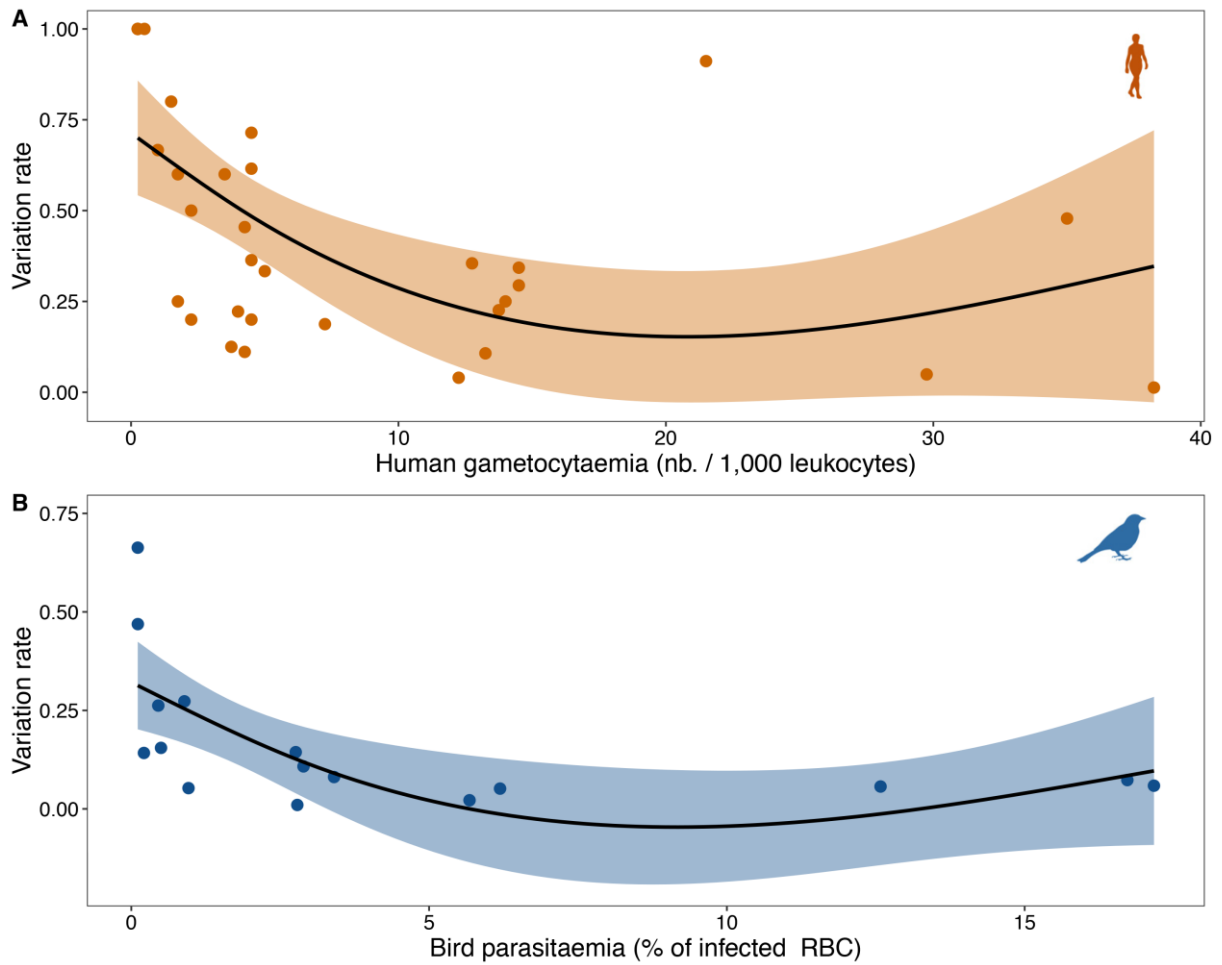

467

468 **Figure 2.** Relationship between variation rate and average parasite density. (A) Variation rate  
469 of gametocyte density between the left and the right hand in human. (B) Variation rate of  
470 parasite density between the left and the right leg in bird. Shaded areas on either side of the  
471 regression line represent the 95% CI.

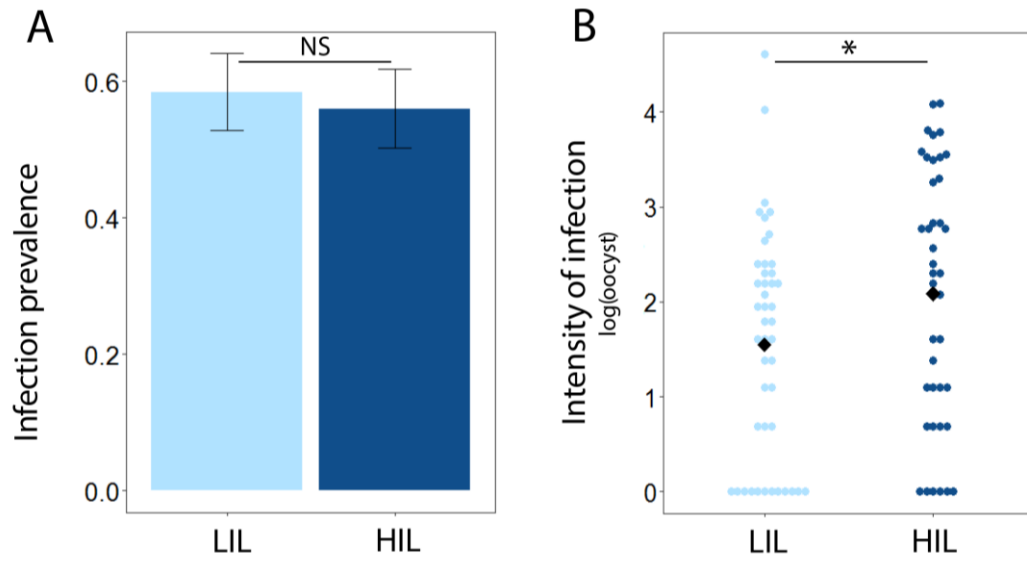

472

473 **Figure 3.** Mean infection prevalence (A) and oocyst burden (B) in mosquitoes fed on either the  
474 lower infected leg (LIL) or on the higher infected leg (HIL). Bars represent standard error  
475 around the mean.

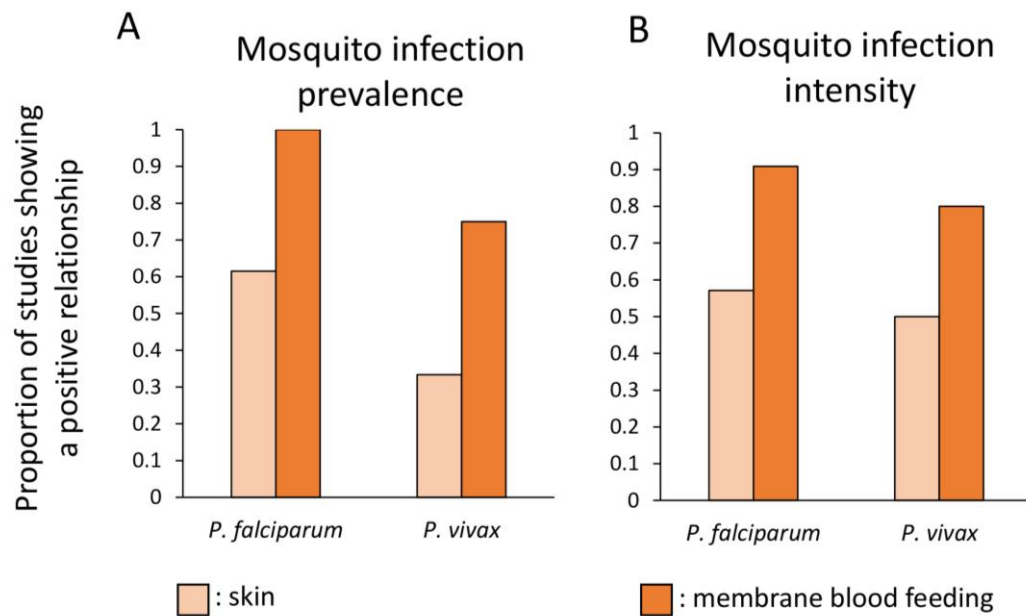

476

477 **Figure S1.** Proportion of studies showing a positive relationship between gametocyte density,  
478 estimated from human blood, and (A) mosquito infection prevalence or (B) oocyst burden.  
479 The light-orange bars represents mosquitoes fed directly on the skin of infected individuals,  
480 the dark-orange bars represents mosquitoes fed with artificial membrane feeding. See Table  
481 S1 for references.
